# Supplementary material for: On the role of sparseness in the evolution of modularity in gene regulatory networks
Source: PubMed Central journal article supplement (PMC5979046; doi:10.1371/journal.pcbi.1006172), 2018-05-18

# A

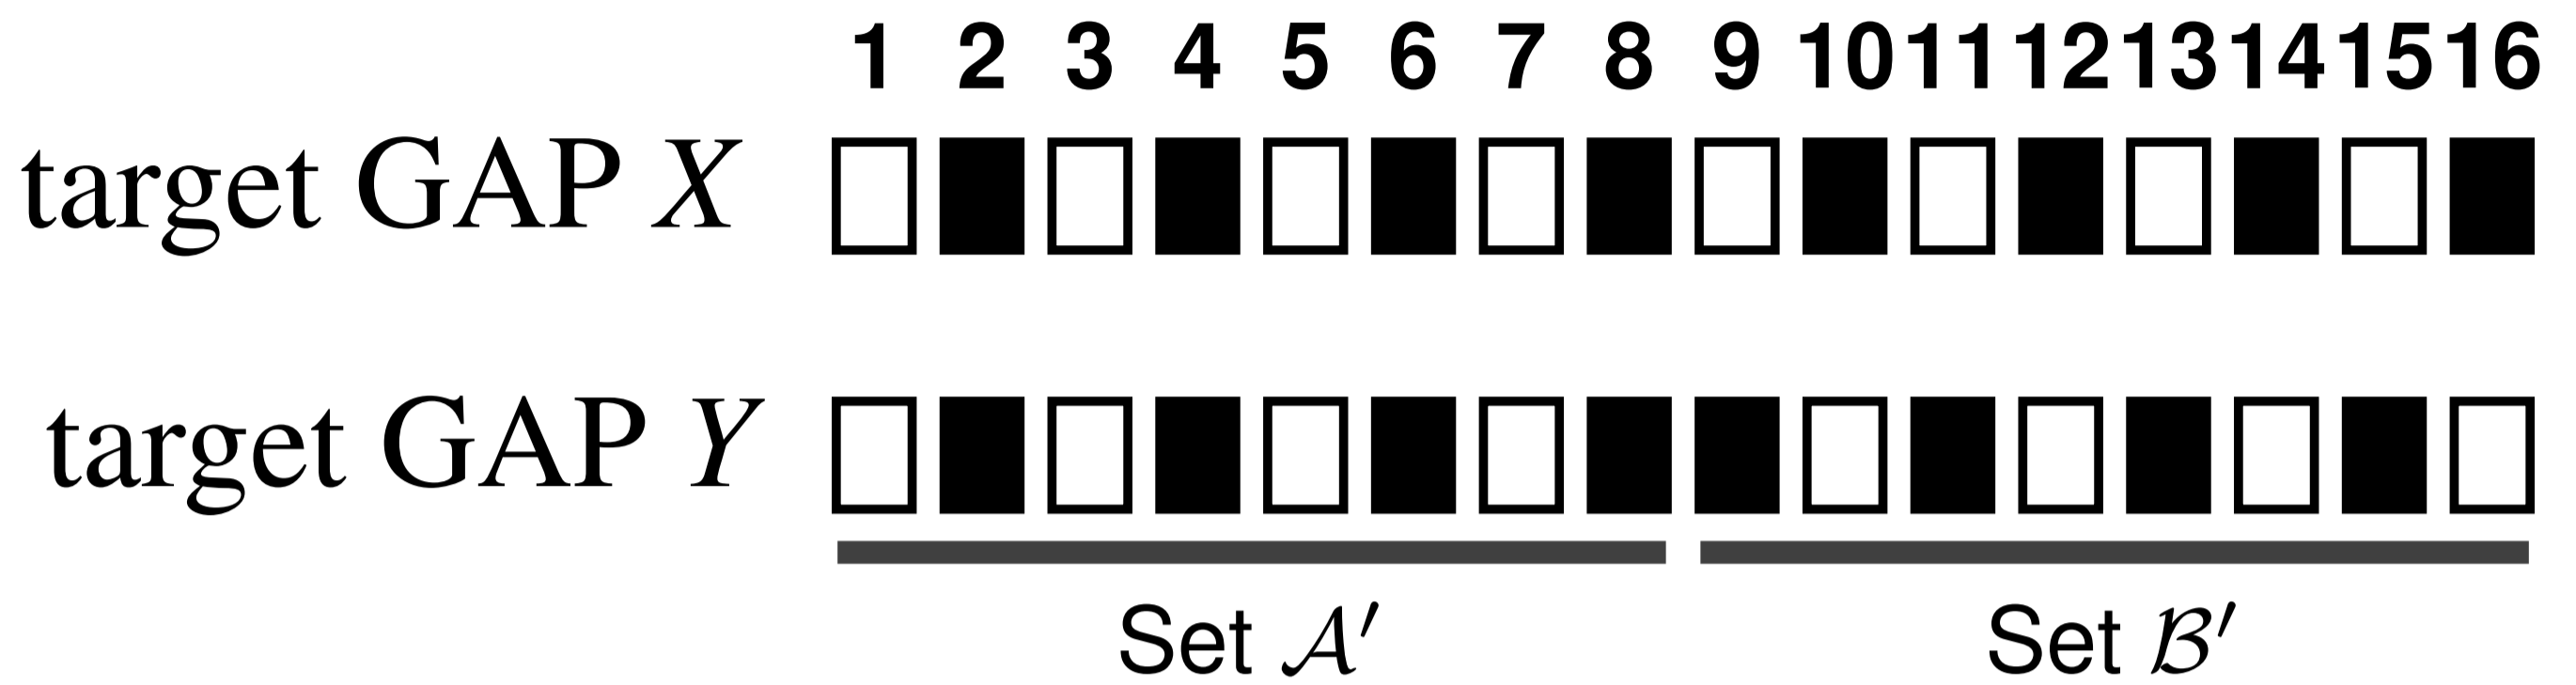

# B

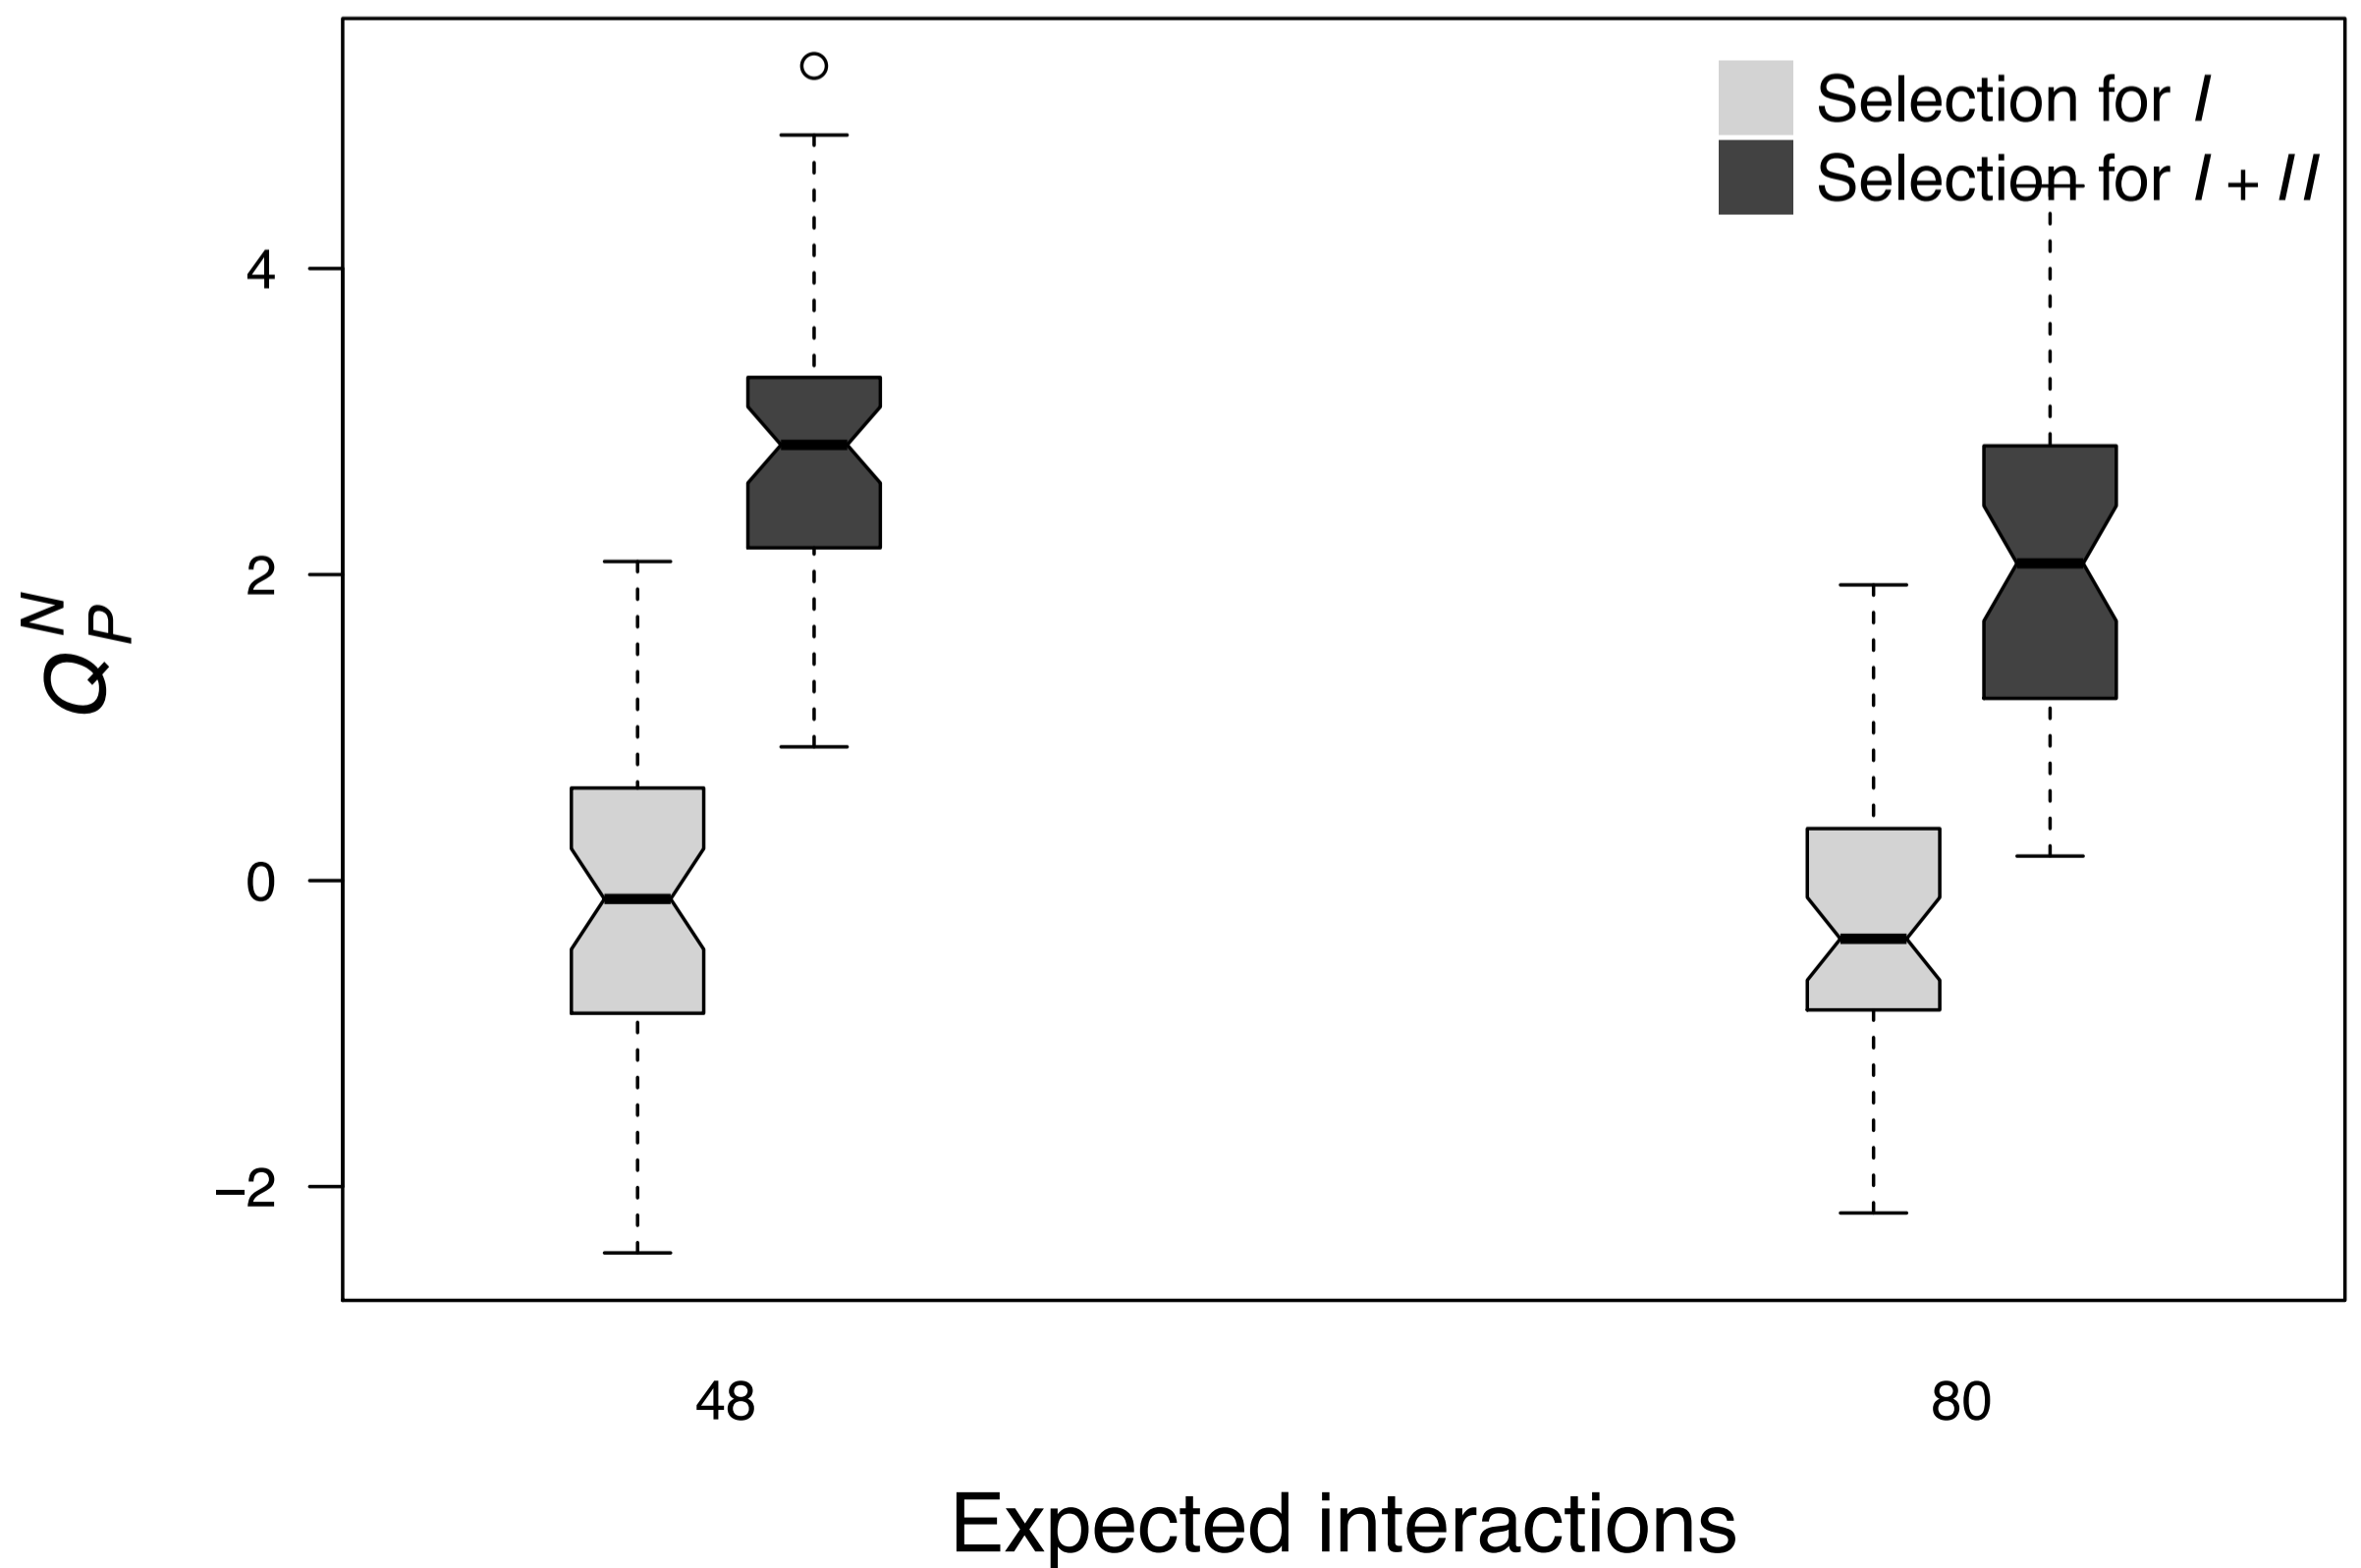

Supplement: pcbi.1006172.s005.pdf [file pcbi.1006172.s005.pdf]
