# Supplementary material for: On the role of sparseness in the evolution of modularity in gene regulatory networks
Source: PubMed Central journal article supplement (PMC5979046; doi:10.1371/journal.pcbi.1006172), 2018-05-18

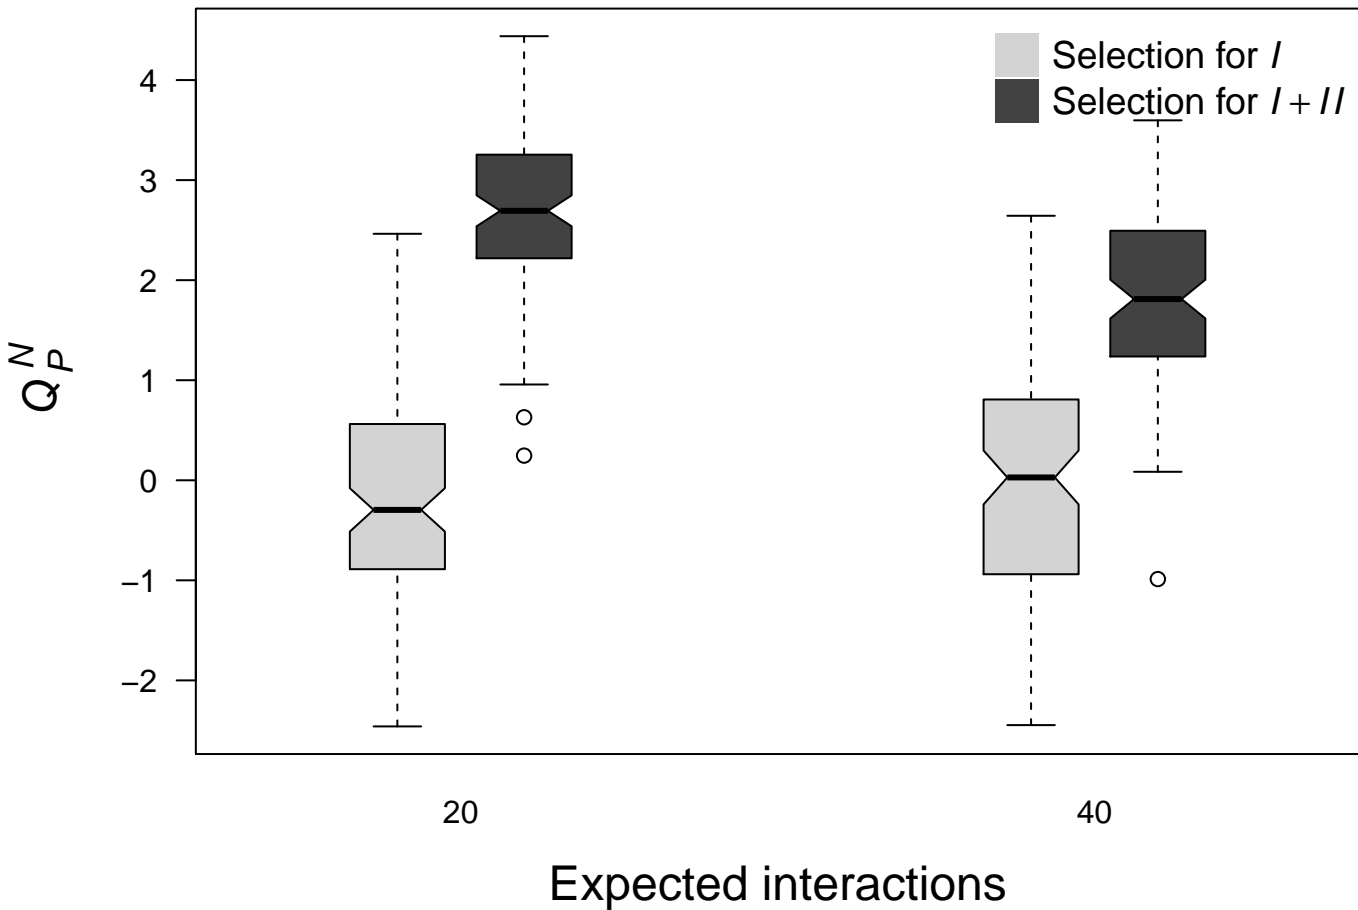

Supplement: pcbi.1006172.s007.pdf [file pcbi.1006172.s007.pdf]
